# Supplementary material for: Lignin Microspheres Modified with Magnetite Nanoparticles as a Selenate Highly Porous Adsorbent
Source: MDPI journal article supplement (doi:10.3390/ijms232213872), 2022-11-10
Supplement: s1 [file ijms-1973357-supplementary.pdf › ijms-1973357-supplementary.pdf]

Supplementary Material

# Lignin Microspheres Modified with Magnetite Nanoparticles as a Selenate Highly Porous Adsorbent

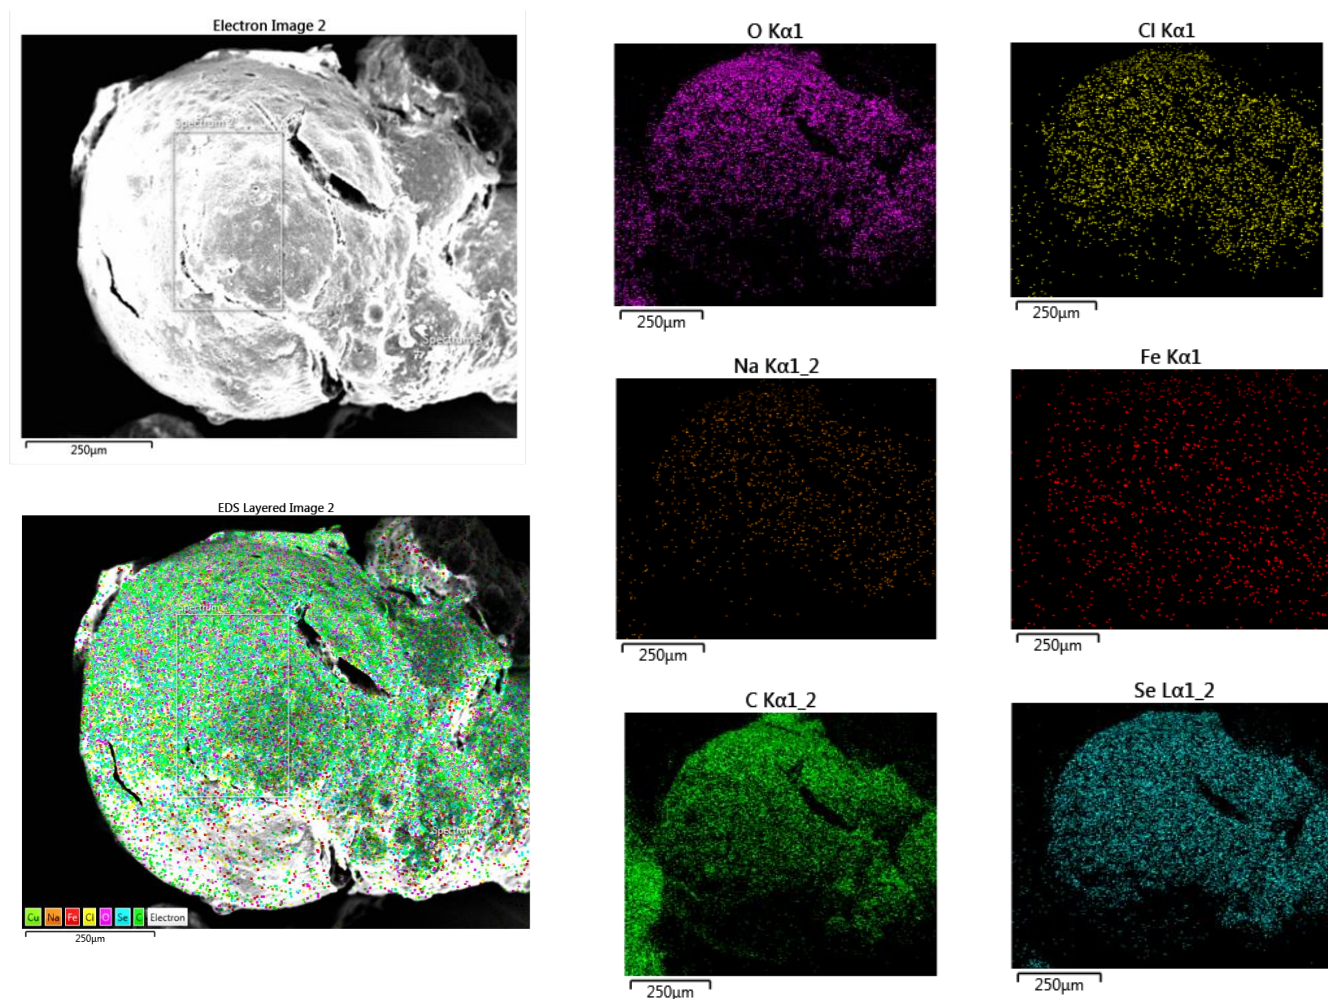

**Figure S1.** Map of element distribution of the A-LMS  $\text{Fe}_3\text{O}_4/\text{Se}$  adsorbent (spectrum 2).

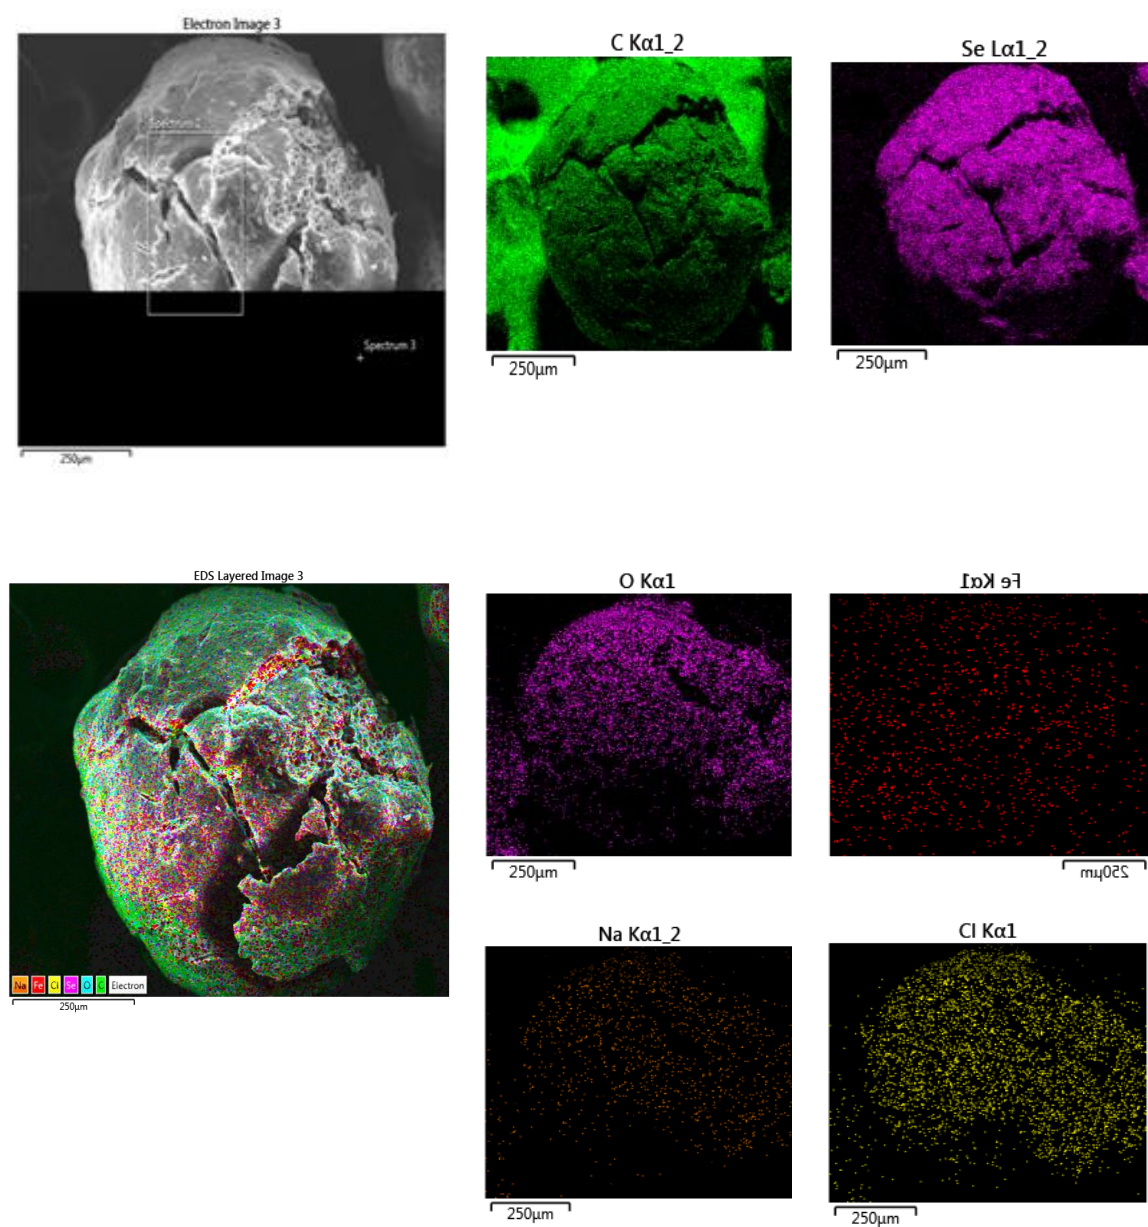

**Figure S2.** Map of element distribution of the A-LMS  $\text{Fe}_3\text{O}_4/\text{Se}$  adsorbent (spectrum 3).

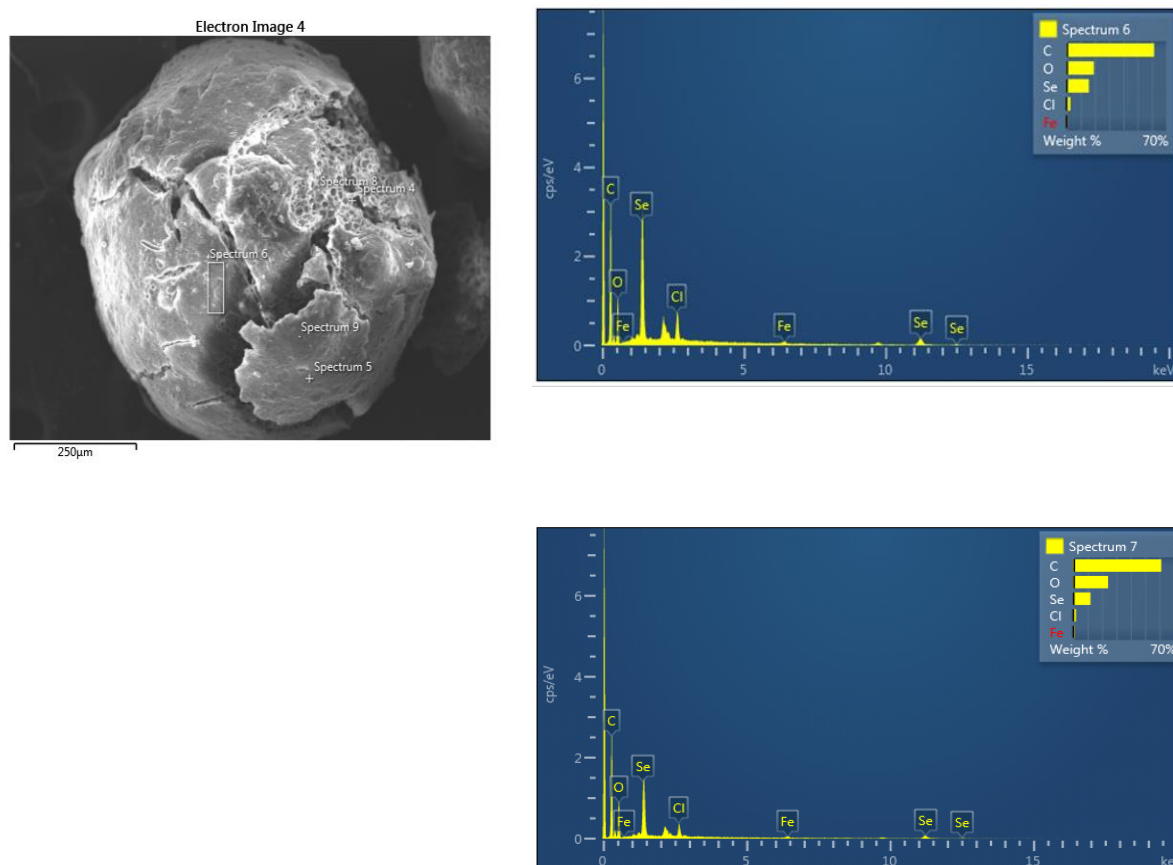

**Figure S3.** EDS image of the A-LMS  $\text{Fe}_3\text{O}_4/\text{Se}$  adsorbent (spectrum 6 and 7).
